# Supplementary material for: From ears to waist: the influence of non-naturalistic sounds on body perception in relation to eating disorders symptomatology
Source: Research Square preprint supplement (doi:10.21203/rs.3.rs-8573418/v1), 2026-01-29
Supplement: Supplementary file 1 [file 58446a01ab9dfdb146898d8b.docx]

**Supplementary Material A: Mean comparisons, correlations, regression analysis and extended discussion for Secondary aim**

**1. Relationship between estimations from body illusions and eating disorders symptomatology, interoceptive awareness and sensory processing sensitivity.**

*1.1. Group comparisons*

All EDE-Q variables showed statistically significant between-group differences with p-values < .001, indicating robust differences in eating disorder measures. Effect sizes ranged from moderate to large (-.427 to -.839), suggesting that between-group differences have significance, especially in "Shape Concern" and "Weight Concern" with the largest effect sizes. For the HSPS variables "Sensitivity to Overstimulation" and "Psychophysiological Discrimination" along with the "Global Score" showed statistically significant differences between groups with p < .001 and p = .005, respectively, and moderate to large effect sizes (-.740, -.621) indicating relevant differences in these sensitivity measures. The MAIA variables "Noticing", "Self-regulation", and "Trusting" showed statistically significant differences between groups, with "Noticing" showing a negative difference (likely indicating greater awareness in the comparison group) and both "Self-regulation" and "Trusting" showing positive differences. Effect sizes suggest moderate to large differences (-.695 to .463). For a detailed view, see **Table S1** and **S2**. However, for those subdimensions with low internal consistency indices, the results should be taken with caution (see **Table S3**).

**Table S1**

*Assessment of Eating Disorder Symptomatology, Sensory Sensitivity and Interoceptive Awareness in Control group.*

| **Questionnair**e | **Variabl**e | **Valid cases** | **Missing values** | **Media** | **Standard Deviation** | **Asymmetry** | **Kurtosis** | **p-value of the Shapiro-Wilk test** |
| --- | --- | --- | --- | --- | --- | --- | --- | --- |
| S-EDE-Q  (ED symptomatology) | Restraint | 45 | 0 | 2.036 | 1.483 | .402 | -.912 | **.**028 |
| Eating Concern | 45 | 0 | 1.719 | 1.225 | .680 | -.194 | **.**020 |
| Shape Concern | 45 | 0 | 3.540 | 1.258 | -.009 | -.633 | .375 |
| Weight Concern | 45 | 0 | 2.853 | 1.422 | .053 | -.545 | .394 |
| Global Score | 45 | 0 | 2.537 | 1.226 | .410 | -.430 | .464 |
| HSPS (sensory sensitivity) | Sensitivity to Overstimulation | 44 | 1 | 44.500 | 7.066 | .133 | -.824 | .121 |
| Aesthetic Sensitivity | 44 | 1 | 30.705 | 4.072 | .183 | .217 | .514 |
| Low Sensory Threshold | 44 | 1 | 21.659 | 5.953 | -.192 | -.534 | .709 |
| Psychophysiological Discrimination | 44 | 1 | 17.841 | 3.864 | -.167 | -.254 | .627 |
| Harm avoidance | 44 | 1 | 16.182 | 2.626 | -.465 | -.031 | **.**038 |
| Global Score | 44 | 1 | 26.177 | 3.001 | .052 | -.549 | .498 |
| MAIA (interoceptive awareness) | Noticing | 44 | 1 | 3.313 | .772 | -.038 | -.812 | .270 |
| Not-distracting | 44 | 1 | 2.818 | .818 | .235 | -1.276 | **.**004 |
| Not-worrying | 44 | 1 | 2.144 | .987 | -.072 | -.614 | .233 |
| Attention Regulation | 44 | 1 | 2.795 | .850 | .113 | -.302 | .678 |
| Emotional Awareness | 44 | 1 | 3.714 | .932 | -.923 | .538 | **.**007 |
| Self-regulation | 44 | 1 | 2.256 | .959 | -.122 | -.673 | .106 |
| Body listening | 44 | 1 | 2.205 | 1.052 | .155 | -.555 | .530 |
| Trusting | 44 | 1 | 2.659 | 1.113 | .033 | -.405 | .660 |
| Global Score | 44 | 1 | 2.738 | .540 | .065 | -.786 | .375 |

**Table S2**

*Comparison of means for variables related to Eating Disorder Symptomatology, Sensory Sensitivity and Interoceptive Awareness.*

|  |  | **M (SD)** | |  |  |  |
| --- | --- | --- | --- | --- | --- | --- |
| **Questionnaires** | **Variable** |  |  | **Statistician** | ***p*** | **Effect size** |
|  |  | **Control** | **Risk** |  |  |  |
|  | Restraint | .962 (.837) | 2.036 (1.483) | 541.500 **a** | **< .001** | **-.427** |
|  | Eating Concern | .647 (.606) | 1.719 (1.225) | 412.500 **a** | **< .001** | **-.563** |
| S-EDE-Q  (ED symptomatology) | Shape Concern | 1.259 (.930) | 3.540 (1.258) | 152.000 **a** | **< .001** | **-.839** |
|  | Weight Concern | .881 (.847) | 2.853 (1.422) | 220.000 **a** | **< .001** | **-.767** |
|  | Global Score | .937 (.659) | 2.537 (1.226) | 215.500 **a** | **< .001** | **-.772** |
|  | Sensitivity to Overstimulation | 39.095 (7.551) | 44.50 (7.066) | -3.429 | **< .001** | **-.740** |
|  | Aesthetic Sensitivity | 29.667 (4.877) | 30.705 (4.072) | -1.073 | .286 | -.231 |
| HSPS (sensory sensitivity) | Low Sensory Threshold | 19.595 (7.037) | 21.659 (5.953) | -1.471 | .145 | -.317 |
| Psychophysiological Discrimination | 15.381 (4.060) | 17.841 (3.864) | -2.879 **b** | **.005b** | **-.621** |
|  | Harm avoidance | 15.595 (2.369) | 16.182 (2.626) | 790.500 | .245 | -.144 |
|  | Global Score | 23.867 (3.751) | 26.177 (3.001) | -3.162 **b** | **.002b** | **-.682** |
|  | Noticing | 2.690 (1.007) | 3.131 (.772) | -3.223 **b** | **.002** | **-.695** |
|  | Not-distracting | 3.127 (.965) | 2.818 (.818) | 1.107.500 | .111 | .199 |
|  | Not-worrying | 2.635 (.925) | 2.144 (.987) | 1.195.500 **a** | **.018** | **.294** |
|  | Attention Regulation | 2.806 (.920) | 2.795 (.850) | .056 | .956 | .012 |
| MAIA (interoceptive  awareness) | Emotional Awareness | 3.405 (.935) | 3.714 (.932) | 726.500 | .088 | -.214 |
|  | Self-regulation | 2.720 (1.070) | 2.256 (.959) | 2.123 **b** | **.037** | **.458** |
|  | Body listening | 2.127 (1.082) | 2.205 (1.052) | -.337 | .737 | -.073 |
|  | Trusting | 3.175 (1.112) | 2.659 (1.113) | 2.148 **b** | **.035** | **.463** |
|  | Global Score | 2.836 (.536) | 2.738 (.540) | .842 | .402 | .182 |

*Note.*a = Mann-Whitney; b = Student's t-test.

**Table S3**

*Reliability analysis for the different dimensions of the questionnaires*.

| **Questionnaire**s | **Variabl**e | **Cronbach's** Alpha |
| --- | --- | --- |
| S-EDE-Q  (EDs symptomatology) | Restraint | .851 |
| Eating Concern | .806 |
| Shape Concern | .927 |
| Weight Concern | .843 |
| Global Score | .956 |
| HSPS (sensory sensitivity) | Sensitivity to Overstimulation | .712 |
| Aesthetic Sensitivity | .524 |
| Low Sensory Threshold | .808 |
| Psychophysiological Discrimination | .409 |
| Harm avoidance | .494 |
| Global Score | .827 |
| MAIA (interoceptive awareness) | Noticing | .676 |
| Not-distracting | .316 |
| Not-worrying | .452 |
| Attention Regulation | .820 |
| Emotional Awareness | .829 |
| Self-regulation | .834 |
| Body listening | .797 |
| Trusting | .850 |
| Global Score | .858 |

*1.2 Correlational analysis between the psychological variables and the estimates from the finger and waist experiments*

With respect to the estimates, as mentioned in previous sections, after the exclusion of 15 outliers identified by box-and-whisker plot analysis, we worked with a final sample of 72 participants. No further participants were excluded since the Mahalanobi's distance revealed the absence of multivariate outliers in relation to the psychological variables.

Correlations were established between those estimates that proved to be significant in previous analyses (i.e., fingertip estimation, finger length and waist width) and the subdimensions assessed in the S-EDE-Q, HSPS and MAIA questionnaires. Significant correlations with the "Constant" condition were omitted as they lacked theoretical relevance.

In Experiment 1, significant, although weak correlations were found between "Fingertip Estimation. Ascending Condition" and "Psychophysiological Discrimination" (HSPS) [r (71) = -.277, p = .019]; "Fingertip Estimation. Condition Descending and Psychophysiological Discrimination (HSPS) [r (71) = -.291, p = .014].

In Experiment 2, significant, although weak correlations were found between "Waist Width Estimation. Ascending Condition" and "Restraint" (S-EDE-Q) [ρ (72) = .319, p = .0006]; "Eating Concern" (S-EDE-Q) [ρ(72) = .255, p = .031]; "Shape Concern" (S-EDE-Q) [r(72) = .370, p = .001]; "Weight Concern" (S-EDE-Q) [ρ (72) = .409, p < .001]; "Global Score" (S-EDE-Q) [ρ (72) = .420, p < .001]; "Sensitivity to Overstimulation" (HSPS) [r(71) = .318, p = .007]; "Global Score" (HSPS) [r(71) = .262, p = .0028]. Likewise, correlations were found between "Waist Width Estimation. Ascending Condition" and variables related to body estimation such as "Pre_Baseline" [ρ (71) = .372, p = .001]; "Post_Ascending" [ρ (71) = .316, p = .007]; "Post_Constant" [ρ (71) = .331 p = .05] and "Post_Descending" [ρ (71) = .314, p = .00].

Significant, although weak correlations were found between "Waist Width Estimation. Descending Condition" and "Restraint" (S-EDE-Q) [ρ(72) = .323, p = .006]; "Eating Concern" (S-EDE-Q) [ρ(72) = .279, p = .018]; "Shape Concern" (S-EDE-Q) [r(72) = .364, p = .002]; "Weight Concern" (S-EDE-Q) [r(72) = .350, p = .003]; "Global Score" (S-EDE-Q) [ρ(72) = .391, p = .001]; "Sensitivity to Overstimulation" (HSPS) [r(71) = .344, p = .003]). Likewise, correlations were found between "Waist Width Estimation. Descending Condition" and variables related to body estimation such as "Pre_Baseline" [(71) = .384, p < .001]; "Post_Ascending" [ρ (71) = .317, p = .007]; "Post_Constant" [ρ (71) = .376, p = .001] and" Post_Descending" [ρ (71) = .394, p < .001].

*Summary*

In summary, for fingertip estimation, in both "Ascending" and "Descending" conditions, weak negative correlations were found with the "Psychophysiological Discrimination (HSPS)" dimension, indicating that as psychophysiological discrimination increases, fingertip estimation tends to decrease, albeit slightly.

In the case of waist width, significant correlations were observed with several subdimensions of the S-EDE-Q and HSPS in both "Ascending" and "Descending" conditions. As concerns related to eating, shape and weight, and sensitivity to overstimulation increase, waist width estimates tend to increase slightly. Finally, as the body estimate of weight increases, the estimate of perceived waist width tends to increase slightly.

*1.3 Analysis of the effect of body estimates on psychological variables*

Finally, simple linear regression analyses were carried out to analyse the predictive relationship between the estimates and the psychological variables measured by the S-EDE-Q, HSPS and MAIA as well as the body size estimates taken using the visualization tool. Analyses were performed for those variables that showed significant correlations. Those regressions with an adjusted R lower than .10 should be taken with caution due to their low explanatory power. In summary, for Experiment 1, both models (see **Table S4** and **S5**) indicate that as psychophysiological discrimination (HSPS) increases, the estimate of fingertip length decreases in both "Ascending" and "Descending" conditions. The effect is significant in both cases, although the amount of variability explained by these models is relatively low, especially once adjusted. For Experiment 2, there is a clear trend: as waist width estimation in an "Ascending" condition increases, a corresponding increase is observed in the various dimensions of eating concerns and body perception assessed by the S-EDE-Q. This suggests a directly proportional relationship between "Estimated waist width (cm) - Ascending Condition" and attitudes related to eating and BI (see from **Table S6** to **Table S25)**.

*Summary*

Regarding the HSPS, both analyses indicate that there is a positive relationship between measures of sensitivity to sensory processing (both sensitivity to overstimulation and overall HSPS score) and waist width estimation in the "Ascending" condition. This suggests that people with higher sensitivity according to the HSPS tend to estimate a larger waist width. Both regression models have statistical significance, although the model related to "Sensitivity to Overstimulation" explains a greater proportion of the variability in waist width estimation than the model based on the "Global Score".

Regarding body estimation measures, the variables (both pre- and post-evaluation) show a significant positive relationship with waist width estimation in the "Ascending" condition.

As for the subdimensions of the S-EDE-Q under the "Ascending" condition, the results yield a clear trend: higher levels of restraint, concern about body shape, concern about weight, and a higher overall score on the S-EDE-Q are significantly associated with a higher waist width estimation in the "Ascending" condition.

Regarding HSPS, the analysis suggests that there is a statistically significant positive relationship between sensitivity to overstimulation and waist width estimation in the "Descending" condition.

Likewise, that, in the "Ascending" condition, in terms of body estimation measures, the variables (both pre and post evaluation) show a significant positive relationship with waist width estimation in the "Descending" condition, indicating that as these variables increase, so does perceive body size.

| **Table S4** |  |  |  |  |  |  |  |  |
| --- | --- | --- | --- | --- | --- | --- | --- | --- |
| *Simple Linear Regression Analysis for 'Fingertip Estimate (cm) - Ascending Condition' on 'Psychophysiological Discrimination' (HSPS)* | | | | | | | | |
| **Variable** | ***b*** | ***b* 95% CI (LS , LI)** | **B** | **SE** | **t** | ***p*** | **R2** | **Adjusted R2** |
| (Constant) | 34.246 | (19.643, 48.848) |  | 7.320 | 4.679 | <.001 |  |  |
| Fingertip estimation. Ascendant | -.680 | (-1.245, -.114 | -.277 | .283 | -2.398 | .019 | .277 | .077 |
| **Note.** *b* represents the unstandardized regression weights. LI and LS indicate the lower and upper bounds of the confidence interval, respectively. B indicates the standardized regression weights. SE represents the standard error of the estimate. *t* represents the calculated value of the test. ***p < .001,  **p < .01, *p < .05. N = 72 | | | | | | | | |

| **Table S5** |  |  |  |  |  |  |  |  |
| --- | --- | --- | --- | --- | --- | --- | --- | --- |
| *Simple Linear Regression Analysis for 'Fingertip Estimation (cm) - Descending Condition' on 'Psychophysiological Discrimination' (HSPS)* | | | | | | | | |
| **Variable** | ***b*** | ***b* 95% CI (LS , LI)** | **B** | **SE** | **t** | ***p*** | **R2** | **Adjusted R2** |
| (Constant) | 37.270 | (21.011, 53.528) |  | 8.150 | 4.573 | <.001 |  |  |
| Fingertip estimation. Descending | -.791 | (-1.416, -.166 | .-.291 | .313 | -2.524 | <.001 | .291 | .085 |
| **Note.** *b* represents the unstandardized regression weights. LI and LS indicate the lower and upper bounds of the confidence interval, respectively. B indicates the standardized regression weights. SE represents the standard error of the estimate. *t* represents the calculated value of the test. ***p < .001,  **p < .01, *p < .05. N = 72. | | | | | | | | |

| **Table S6** |  |  |  |  |  |  |  |  |
| --- | --- | --- | --- | --- | --- | --- | --- | --- |
| *Simple Linear Regression Analysis for 'Estimated Waist Width (cm) - Ascending Condition' on 'Restraint' (S-EDE-Q)* | | | | | | | | |
| **Variable** | ***b*** | ***b* 95% CI (LS , LI)** | **B** | **SE** | **t** | ***p*** | **R2** | **Adjusted R2** |
| (Constant) | -1.701 | (-3.438, .036) |  | .871 | -1.953 | .055 |  |  |
| Waist width estimation Ascending | .145 | (.068, .222) | .409 | .039 | 3.755 | < .001 | .409 | .156 |
| **Note.** *b* represents the unstandardized regression weights. LI and LS indicate the lower and upper bounds of the confidence interval, respectively. B indicates the standardized regression weights. SE represents the standard error of the estimate. *t* represents the calculated value of the test. ***p < .001,  **p < .01, *p < .05. N = 72. | | | | | | | | |

| **Table S7** |  |  |  |  |  |  |  |  |
| --- | --- | --- | --- | --- | --- | --- | --- | --- |
| *Simple Linear Regression Analysis for 'Estimated Waist Width (cm) - Ascending Condition' on 'Eating Concern (S-EDE-Q)* | | | | | | | | |
| **Variable** | ***b*** | ***b* 95% CI (LS , LI)** | **B** | **SE** | **t** | ***p*** | **R2** | **Adjusted R2** |
| (Constant) | -1.195 | (-2.736, .346) |  | .773 | -1.547 | .126 |  |  |
| Waist width estimation Ascending | .109 | (.040, .177) | .354 | .034 | 3.169 | .002 | .354 | .113 |
| **Note.** *b* represents the unstandardized regression weights. LI and LS indicate the lower and upper bounds of the confidence interval, respectively. B indicates the standardized regression weights. SE represents the standard error of the estimate. *t* represents the calculated value of the test. ***p < .001,  **p < .01, *p < .05. N = 72. | | | | | | | | |

| **Table S8** |  |  |  |  |  |  |  |  |
| --- | --- | --- | --- | --- | --- | --- | --- | --- |
| *Simple Linear Regression Analysis for 'Estimated Waist Width (cm) - Ascending Condition' on 'Shape Concern (S-EDE-Q)* | | | | | | | | |
| **Variable** | ***b*** | ***b* 95% CI (LS , LI)** | **B** | **SE** | **t** | ***p*** | **R2** | **Adjusted R2** |
| (Constant) | -1.211 | (-3.396,.974) |  | 1.095 | -1.106 | .273 |  |  |
| Waist width estimation Ascending | .163 | (.066, .260) | .372 | .049 | 3.355 | .001 | .372 | .126 |
| **Note.** *b* represents the unstandardized regression weights. LI and LS indicate the lower and upper bounds of the confidence interval, respectively. B indicates the standardized regression weights. SE represents the standard error of the estimate. *t* represents the calculated value of the test. ***p < .001,  **p < .01, *p < .05. N = 72. | | | | | | | | |

| **Table S9** |  |  |  |  |  |  |  |  |
| --- | --- | --- | --- | --- | --- | --- | --- | --- |
| *Simple Linear Regression Analysis for 'Estimated Waist Width (cm) - Ascending Condition' on 'Weight Concern (S-EDE-Q)* | | | | | | | | |
| **Variable** | ***b*** | ***b* 95% CI (LS , LI)** | **B** | **SE** | **t** | ***p*** | **R2** | **Adjusted R2** |
| (Constant) | -1.925 | (-3.975, .124) |  | 1.028 | -1.874 | .065 |  |  |
| Waist width estimation Ascending | .171 | (.080, .262) | .409 | .046 | 3.747 | <.001 | .409 | .155 |
| **Note.** *b* represents the unstandardized regression weights. LI and LS indicate the lower and upper bounds of the confidence interval, respectively. B indicates the standardized regression weights. SE represents the standard error of the estimate. *t* represents the calculated value of the test. ***p < .001,  **p < .01, *p < .05. N = 72. | | | | | | | | |

| **Table S10** |  |  |  |  |  |  |  |  |
| --- | --- | --- | --- | --- | --- | --- | --- | --- |
| *Simple Linear Regression Analysis for 'Estimated Waist Width (cm) - Ascending Condition' on 'Global Score (S-EDE-Q)* | | | | | | | | |
| **Variable** | ***b*** | ***b* 95% CI (LS , LI)** | **B** | **SE** | **t** | ***p*** | **R2** | **Adjusted R2** |
| (Constant) | -1.508 | (-3.215, .198) |  | .856 | -1.763 | .082 |  |  |
| Waist width estimation Ascending | .147 | (.071, .223) | .420 | .038 | 3.870 | <.001 | .420 | .165 |
| **Note.** *b* represents the unstandardized regression weights. LI and LS indicate the lower and upper bounds of the confidence interval, respectively. B indicates the standardized regression weights. SE represents the standard error of the estimate. *t* represents the calculated value of the test. ***p < .001,  **p < .01, *p < .05. N = 72. | | | | | | | | |

| **Table S11** |  |  |  |  |  |  |  |  |
| --- | --- | --- | --- | --- | --- | --- | --- | --- |
| *Simple Linear Regression Analysis for 'Estimated Waist Width (cm) - Ascending Condition' on 'Sensitivity to Overstimulation(HSPS)* | | | | | | | | |
| **Variable** | ***b*** | ***b* 95% CI (LS , LI)** | **B** | **SE** | **t** | ***p*** | **R2** | **Adjusted R2** |
| (Constant) | 27.252 | (16.545, 37.960) |  | 5.367 | 5.077 | <.001 |  |  |
| Waist width estimation Ascending | .667 | (.190, 1.144) | .318 | .239 | 2.791 | .007 | .318 | .101 |
| **Note.** *b* represents the unstandardized regression weights. LI and LS indicate the lower and upper bounds of the confidence interval, respectively. B indicates the standardized regression weights. SE represents the standard error of the estimate. *t* represents the calculated value of the test. ***p < .001,  **p < .01, *p < .05. N = 72. | | | | | | | | |

| **Table S12** |  |  |  |  |  |  |  |  |
| --- | --- | --- | --- | --- | --- | --- | --- | --- |
| *Simple Linear Regression Analysis for 'Estimated Waist Width (cm) - Ascending Condition' on 'Global Score' (HSPS)* | | | | | | | | |
| **Variable** | ***b*** | ***b* 95% CI (LS , LI)** | **B** | **SE** | **t** | ***p*** | **R2** | **Adjusted R2** |
| (Constant) | -1.508 | (-3.215, 0.198) |  | .856 | -1.763 | .082 |  |  |
| Waist width estimation Ascending | .257 | (.029-.485) | .262 | .114 | 2.251 | .028 | .262 | .068 |
| **Note.** *b* represents the unstandardized regression weights. LI and LS indicate the lower and upper bounds of the confidence interval, respectively. B indicates the standardized regression weights. SE represents the standard error of the estimate. *t* represents the calculated value of the test. ***p < .001, **p < .01, *p < .05. N = 72. | | | | | | | | |

.

| **Table S13** |  |  |  |  |  |  |  |  |
| --- | --- | --- | --- | --- | --- | --- | --- | --- |
| *Simple Linear Regression Analysis for 'Estimated Waist Width (cm) - Ascending Condition' on 'Pre_Baseline'.* | | | | | | | | |
| **Variable** | ***b*** | ***b* 95% CI (LS , LI)** | **B** | **SE** | **t** | ***p*** | **R2** | **Adjusted R2** |
| (Constant) | -41.365 | (-69.543, -  13.186) |  | 14.125 | -2.929 | .005 |  |  |
| Waist width estimation Ascending | 2.095 | (.840-3.351) | .372 | .629 | 3.329 | .001 | .372 | .138 |
| **Note.** *b* represents the unstandardized regression weights. LI and LS indicate the lower and upper bounds of the confidence interval, respectively. B indicates the standardized regression weights. SE represents the standard error of the estimate. *t* represents the calculated value of the test. ***p < .001, **p < .01, *p < .05. N = 72. | | | | | | | | |

| **Table S14** |  |  |  |  |  |  |  |  |
| --- | --- | --- | --- | --- | --- | --- | --- | --- |
| *Simple Linear Regression Analysis for 'Estimated waist width (cm) - Ascending Condition' on 'Post_Ascending'.* | | | | | | | | |
| **Variable** | ***b*** | ***b* 95% CI (LS , LI)** | **B** | **SE** | **t** | ***p*** | **R2** | **Adjusted R2** |
| (Constant) | -29.798 | (-52.676, -6.921) |  | 11.468 | -2.598 | .011 |  |  |
| Waist width estimation Ascending | 1.412 | .393, 2.431 | 1.412 | .511 | 2.763 | .007 | .316 | .100 |
| **Note.** *b* represents the unstandardized regression weights. LI and LS indicate the lower and upper bounds of the confidence interval, respectively. B indicates the standardized regression weights. SE represents the standard error of the estimate. *t* represents the calculated value of the test. ***p < .001, **p < .01, *p < .05. N = 72. | | | | | | | | |

| **Table S15** |  |  |  |  |  |  |  |  |
| --- | --- | --- | --- | --- | --- | --- | --- | --- |
| *Simple Linear Regression Analysis for 'Estimated waist width (cm) - Ascending Condition' on 'Post_Constant'.* | | | | | | | | |
| **Variable** | ***b*** | ***b* 95% CI (LS , LI)** | **B** | **SE** | **t** | ***p*** | **R2** | **Adjusted R2** |
| (Constant) | -33.734 | (-57.363, -  10.105) |  | 11.844 | -2.848 | .006 |  |  |
| Waist width estimation Ascending | 1.536 | (.483, 2.589) | .331 | .528 | 2.911 | .005 | .331 | .109 |
| **Note.** *b* represents the unstandardized regression weights. LI and LS indicate the lower and upper bounds of the confidence interval, respectively. B indicates the standardized regression weights. SE represents the standard error of the estimate. *t* represents the calculated value of the test. ***p < .001, **p < .01, *p < .05. N = 72. | | | | | | | | |

| **Table S16** |  |  |  |  |  |  |  |  |
| --- | --- | --- | --- | --- | --- | --- | --- | --- |
| *Simple Linear Regression Analysis for 'Estimated waist width (cm) - Ascending Condition' on 'Post_Descending'.* | | | | | | | | |
| **Variable** | ***b*** | ***b* 95% CI (LS , LI)** | **B** | **SE** | **t** | ***p*** | **R2** | **Adjusted R2** |
| (Constant) | -.33.408 | (-57.671, -9.144) |  | 12.163 | -2.747 | .008 |  |  |
| Waist width estimation Ascending | 1.491 | (.410, 2.572) | .314 | .542 | 2.752 | .008 | .314 | .099 |
| **Note.** *b* represents the unstandardized regression weights. LI and LS indicate the lower and upper bounds of the confidence interval, respectively. B indicates the standardized regression weights. SE represents the standard error of the estimate. *t* represents the calculated value of the test. ***p < .001, **p < .01, *p < .05. N = 72. | | | | | | | | |

| **Table S17** |  |  |  |  |  |  |  |  |
| --- | --- | --- | --- | --- | --- | --- | --- | --- |
| *Simple Linear Regression Analysis for 'Estimated Waist Width (cm) - Descending Condition on Restraint' (S-EDE-Q)* | | | | | | | | |
| **Variable** | ***b*** | ***b* 95% CI (LS , LI)** | **B** | **SE** | **t** | ***p*** | **R2** | **Adjusted R2** |
| (Constant) | -1.098 | (-2.783, .587) |  | .845 | -1.300 | .198 |  |  |
| Waist width estimation Descending | .120 | .044, .197) | .353 | .038 | 3.154 | .002 | .353 | .124 |
| **Note.** *b* represents the unstandardized regression weights. LI and LS indicate the lower and upper bounds of the confidence interval, respectively. B indicates the standardized regression weights. SE represents the standard error of the estimate. *t* represents the calculated value of the test. ***p < .001, **p < .01, *p < .05. N = 72. | | | | | | | | |

| **Table S18** |  |  |  |  |  |  |  |  |
| --- | --- | --- | --- | --- | --- | --- | --- | --- |
| *Simple Linear Regression Analysis for 'Estimated Waist Width (cm) - Descending Condition on 'Shape Concern' (S- EDE-Q)* | | | | | | | | |
| **Variable** | ***b*** | ***b* 95% CI (LS , LI)** | **B** | **SE** | **t** | ***p*** | **R2** | **Adjusted R2** |
| (Constant) | -1.115 | (-3.170, .940) |  | 1.030 | -1.082 | .283 |  |  |
| Waist width estimation Descending | .162 | (.069, .255) | .384 | .047 | 3.478 | < .001 | .384 | .135 |
| **Note.** *b* represents the unstandardized regression weights. LI and LS indicate the lower and upper bounds of the confidence interval, respectively. B indicates the standardized regression weights. SE represents the standard error of the estimate. *t* represents the calculated value of the test. ***p < .001, **p < .01, *p < .05. N = 72. | | | | | | | | |

| **Table S19** |  |  |  |  |  |  |  |  |
| --- | --- | --- | --- | --- | --- | --- | --- | --- |
| *Simple Linear Regression Analysis for 'Waist Width Estimate (cm) - Descending Condition on Weight Concern (S- EDE-Q)* | | | | | | | | |
| **Variable** | ***b*** | ***b* 95% CI (LS , LI)** | **B** | **SE** | **t** | ***p*** | **R2** | **Adjusted R2** |
| (Constant) | -1.547 | (-3.502, .408) |  | .980 | -1.578 | .119 |  |  |
| Waist width estimation Descending | .157 | (.069, .245) | .390 | 0.044 | 3.543 | ***< .001 | .390 | .140 |
| **Note.** *b* represents the unstandardized regression weights. LI and LS indicate the lower and upper bounds of the confidence interval, respectively. B indicates the standardized regression weights. SE represents the standard error of the estimate. *t* represents the calculated value of the test. ***p < .001, **p < .01, *p < .05. N = 72. | | | | | | | | |

| **Table S20** |  |  |  |  |  |  |  |  |
| --- | --- | --- | --- | --- | --- | --- | --- | --- |
| *Simple Linear Regression Analysis for 'Estimated Waist Width (cm) - Descending Condition on Global Score' (S- EDE-Q)* | | | | | | | | |
| **Variable** | ***b*** | ***b* 95% CI (LS , LI)** | **B** | **SE** | **t** | ***p*** | **R2** | **Adjusted R2** |
| (Constant) | -1.160 | (-2.792, .471) |  | .818 | -1.418 | .160 |  |  |
| Waist width estimation Descending | .134 | (.060, .208) | .397 | .037 | 3.623 | ***< .001 | .397 | .146 |
| **Note.** *b* represents the unstandardized regression weights. LI and LS indicate the lower and upper bounds of the confidence interval, respectively. B indicates the standardized regression weights. SE represents the standard error of the estimate. *t* represents the calculated value of the test. ***p < .001, **p < .01, *p < .05. N = 72. | | | | | | | | |

| **Table S21** |  |  |  |  |  |  |  |  |
| --- | --- | --- | --- | --- | --- | --- | --- | --- |
| *Simple Linear Regression Analysis for 'Estimated Waist Width (cm) - Descending Condition on 'Sensitivity to Overstimualtion'.* | | | | | | | | |
| **Variable** | ***b*** | ***b* 95% CI (LS , LI)** | **B** | **SE** | **t** | ***p*** | **R2** | **Adjusted R2** |
| (Constant) | 26.814 | 16.706, 36.922 | 5.067 |  | 5.292 | < .001 |  |  |
| Waist width estimation Descending | .702 | .243, 1.162 | .230 | .230 | 3.048 | .003 | .119 | .106 |
| **Note.** *b* represents the unstandardized regression weights. LI and LS indicate the lower and upper bounds of the confidence interval, respectively. B indicates the standardized regression weights. SE represents the standard error of the estimate. *t* represents the calculated value of the test. ***p < .001, **p < .01, *p < .05. N = 72. | | | | | | | | |

| **Table S22** |  |  |  |  |  |  |  |  |
| --- | --- | --- | --- | --- | --- | --- | --- | --- |
| *Simple Linear Regression Analysis for 'Estimated waist width (cm) - Descending Condition on 'Pre_Baseline'.* | | | | | | | | |
| **Variable** | ***b*** | ***b* 95% CI (LS , LI)** | **B** | **SE** | **t** | ***p*** | **R2** | **Adjusted R2** |
| (Constant) | -40.511 | (-67.233, -  13.788) |  | 13.395 | -3.024 | .003 |  |  |
| Waist width estimation Descending | 2.101 | .887, 3.316 | .384 | .609 | 3.451 | < .001 | .147 | .135 |
| **Note.** *b* represents the unstandardized regression weights. LI and LS indicate the lower and upper bounds of the confidence interval, respectively. B indicates the standardized regression weights. SE represents the standard error of the estimate. *t* represents the calculated value of the test. ***p < .001, **p < .01, *p < .05. N = 72. | | | | | | | | |

| **Table S23** |  |  |  |  |  |  |  |  |
| --- | --- | --- | --- | --- | --- | --- | --- | --- |
| *Simple Linear Regression Analysis for 'Estimated Waist Width (cm) - Descending Condition on 'Post_* Ascending'. | | | | | | | | |
| **Variable** | ***b*** | ***b* 95% CI (LS , LI)** | **B** | **SE** | **t** | ***p*** | **R2** | **Adjusted R2** |
| (Constant) | -28.408 | (-50.206, -  6.611) |  | 10.926 | -2.600 | .011 |  |  |
| Waist width estimation Descending | 1.379 | .388, 2.369 | .317 | .497 | 2.775 | .007 | .100 | .087 |
| **Note.** *b* represents the unstandardized regression weights. LI and LS indicate the lower and upper bounds of the confidence interval, respectively. B indicates the standardized regression weights. SE represents the standard error of the estimate. *t* represents the calculated value of the test. ***p < .001, **p < .01, *p < .05. N = 72. | | | | | | | | |

| **Table S24** |  |  |  |  |  |  |  |  |
| --- | --- | --- | --- | --- | --- | --- | --- | --- |
| *Simple Linear Regression Analysis for 'Estimated Waist Width (cm) - Descending Condition on 'Post_Constant'.* | | | | | | | | |
| **Variable** | ***b*** | ***b* 95% CI (LS , LI)** | **B** | **SE** | **t** | ***p*** | **R2** | **Adjusted R2** |
| (Constant) | -36.508 | (-58.625, -  14.391) |  | 11.087 | -3.293 | .002 |  |  |
| Waist width estimation Descending | 1.698 | (.692,2.703) | .376 | .504 | 3.368 | .001 | .141 | .129 |
| **Note.** *b* represents the unstandardized regression weights. LI and LS indicate the lower and upper bounds of the confidence interval, respectively. B indicates the standardized regression weights. SE represents the standard error of the estimate. *t represents* the calculated value of the test. ***p < .001, **p < .01, *p < .05. N = 72. | | | | | | | | |

| **Table S25** |  |  |  |  |  |  |  |  |
| --- | --- | --- | --- | --- | --- | --- | --- | --- |
| *Simple Linear Regression Analysis for 'Estimated Waist Width (cm) - Descending on Post_Descending Condition'.* | | | | | | | | |
| **Variable** | ***b*** | ***b* 95% CI**  **(LS , LI)** | **B** | **SE** | **t** | ***p*** | **R2** | **Adjusted R2** |
| (Constant) | -39.747 | (-62.143, -  17.352) |  | 11.226 | -3.541 | < .001 |  |  |
| Waist width estimation Descending | 1.816 | .510 | .394 | .510 | 3.559 | < .001 | .155 | .143 |
| **Note.** *b* represents the unstandardized regression weights. LI and LS indicate the lower and upper bounds of the confidence interval, respectively. B indicates the standardized regression weights. SE represents the standard error of the estimate. *t* represents the calculated value of the test. ***p < .001, **p < .01, *p < .05. N = 72. | | | | | | | | |

**Supplemental material B**

***1. Discussion***

*1.1 Eating Disorder Symptomatology, Sensory Sensitivity, and Interoceptive Awareness: Findings from Mean Comparisons*

To characterize the sample, mean comparisons were conducted across several psychological constructs assessed by the S-EDE-Q (EDs symptomatology), HSPS (sensory-processing sensitivity), and the MAIA (interoceptive awareness).

In the S-EDE-Q, as expected, the "Subclinical" group reported significantly elevated mean scores across all evaluated domains, including "Restraint", "Eating Concern", 'shape Concern", "Weight Concern", and the "Global Score" compared to the "Control" group. Regarding the HSPS, the "Subclinical" group exhibited higher scores in "Sensitivity to Overstimulation" (i.e., heightened response to sensory input or environmental stimuli) and the "Global Score". These findings suggest an enhanced perceptual sensitivity to sensory stimuli, potentially exacerbating stress and anxiety levels previously linked to the onset of EDs (Peterson et al, 2024). Moreover, this amplified sensitivity may predispose individuals to heightened discomfort or distress in situations perceived as sensorially overwhelming (Peterson et al, 2024). In the MAIA, the "Subclinical" group showed higher scores in "Not Distracting" (i.e., not ignoring painful/uncomfortable sensations) and "Emotional Awareness" (i.e., attributing body sensations to emotional states). However, it is important to note that the "Not Distracting" domain, referring to not ignoring painful or uncomfortable sensations, displayed a very low alpha consistency (α= .316), which precludes the interpretation of results. "Emotional Awareness" refers to the embodied or interoceptive experience of emotions, highlighting an intensified perception of emotional states tied to bodily sensations in the "Subclinical" group.

*1.2 Examining the link between body position/size measures and interoceptive body awareness as well as sensory-processing sensitivity*

For fingertip estimations in both "Ascending" and "Descending" conditions, weak negative correlations were found with the "Psychophysiological Discrimination (HSPS)" dimension (i.e., discrimination against subtleties or physical/physiological sensitivity in reaction to internal stimuli). According to Ainley et al. (2016), individuals vary in their awareness of internal bodily sounds-a trait measured as "interoceptive accuracy". Applying this framework based on the predictive coding theory, it seems reasonable to assume that individuals with higher psychophysiological discrimination prioritize interoception sounds, potentially enabling them to adjust the precision of interoceptive predictions and prediction errors more effectively. This heightened awareness allows them to modulate the precision of how they interpret, in this case, auditory sensory information, leading to a more nuanced perception of auditory stimuli. This modulation, influenced by an enhanced interoceptive awareness, could lead to the nuanced perception of auditory sounds as less intense or significant.

For waist width estimations, significant correlations were observed with several subdimensions of the S-EDE-Q, in both "Ascending" and "Descending" conditions. These correlations were positive, suggesting that as concerns related to eating, shape, and weight increase, waist width estimations also tend to slightly increase. For the body size task conducted with the body visualizer tool, positive correlations were observed between waist width and perceived weight, regardless of the sound condition. From the perspective of predictive coding theory, the "Ascending" condition, which leads to the perception of a wider waist, aligns with the pre-existing beliefs or predictions about body shape/weight, illustrating how auditory sensory information can reinforce pre-existing predictive models. Conversely, the positive correlation in the "Descending" condition, where one might expect waist width estimations to decrease (given that it typically induces perceptions of a narrower waist), highlights the resilience of predictive models in the face of contradictory auditory sensory evidence. Despite this condition potentially inducing a sensation of a narrower waist, individuals with heightened concerns related to eating, shape, and weight still tend to perceive their waist as wider. This underscores the challenge in updating predictive models, even when confronted with auditory sounds that should theoretically induce a sensation contradicting these models.

In addition, for waist width significant positive correlations were observed with "Sensitivity to Overstimulation" (HSPS), in both "Ascending" and "Descending" conditions. This may indicate that individuals highly sensitive to overstimulation, the effect of auditory stimuli might be processed differently. Their heightened sensitivity could mean that any form of strong sensory input, regardless of its expected perceptual outcome (narrower or wider waist), might be overwhelming and thereby reinforce their focus on body concerns. Essentially, the sensory input fails to update their predictive models effectively due to their heightened sensitivity to sensory stimuli.

Regarding the regression models, similar relationships are observed. Most of the EDE-Q subscales and body size discrepancy and "Sensitivity to Overstimulation" (HSPS) are predicted by a greater waist width regardless of the "Ascending" and "Descending" conditions. Moreover, the predictive power of the models, as indicated by R-squared values, while statistically significant, explains only a small portion of the variance in body size discrepancies. This suggests that while ED symptomatology, sensory-processing sensitivity and interoceptive awareness play a role in body size perceptions, especially for waist width, they are among multiple factors that contribute to these perceptions.

Additionally, correlations and regressions revealed that sensory-processing sensitivity can amplify the impact of sensory stimuli on body perception, making individuals more prone to perceiving their waist-width under the "Descending" condition more inaccurately. Acknowledging and addressing individual differences such as in sensory-processing sensitivity among individuals will be crucial in tailoring interventions more effectively (Gadsby, 2019).

**References**

1. Ainley, V., Apps, M. A. J., Fotopoulou, A., Tsakiris, M., & Ainley, V. (2016). ' Bodily precision ': a predictive coding account of individual differences in interoceptive accuracy. *Philos T R Soc B*, *371*(1708), 20160003. <https://doi.org/http://dx.doi.org/10.1098/rstb.2016.0003>
2. Gadsby, S. (2019). Manipulating body representations with virtual reality: Clinical implications for anorexia nervosa. *Philos. Psychol.*, *32*(6), 900-924. https://doi.org/10.1080/09515089.2019.1632425
3. Peterson, C. B., Weber, E., & Sim, L. (2024). Optimizing treatment environments for trait sensitivity in eating disorders. *Eating disorders*, *32*(3), 325-339. https://doi.org/10.1080/10640266.2024.2306429
